# Supplementary material for: Limited Pollen Dispersal Contributes to Population Genetic Structure but Not Local Adaptation in Quercus oleoides Forests of Costa Rica
Source: PLOS journal article supplement (doi:10.1371/journal.pone.0138783), 2015-09-25
Supplement: S2 (10.1371/journal.pone.0138783.s002) [file journal.pone.0138783.s002]

**S2 Fig. Map of pollen dispersal and common garden sites.** A) Sites where mothers and progeny were collected for TwoGener analysis (stars), paternity analysis (circle), and flowering phenology monitoring (squares). GPS points for mother trees on right of map. B) Sites of common gardens (stars) and area from where upland and lowland progeny were collected (dotted circle). GPS points for mother trees on right of map.

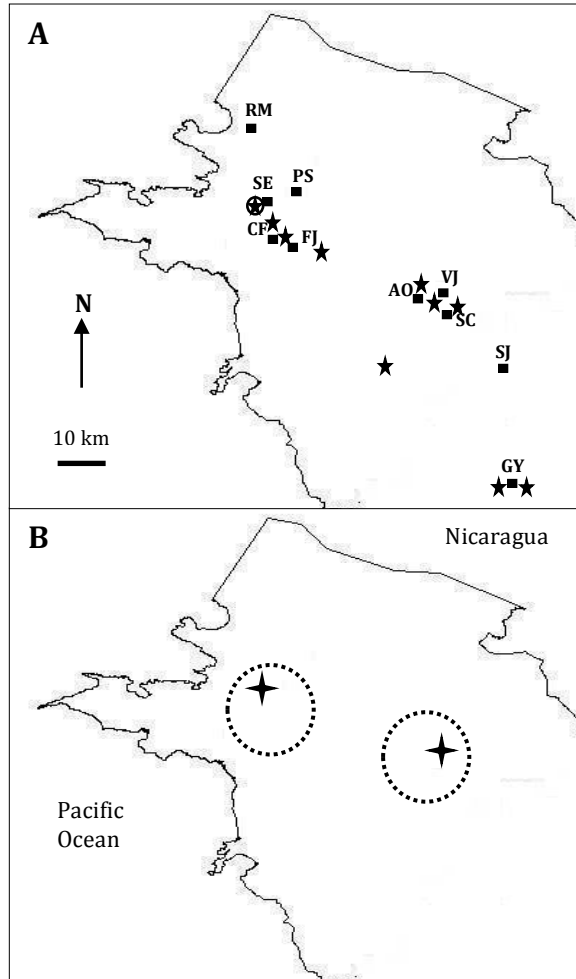

| Lat.  | Long.  | Mother Tree |
|-------|--------|-------------|
| 10.78 | -85.35 | M1          |
| 10.78 | -85.36 | M3          |
| 10.54 | -85.32 | M4          |
| 10.54 | -85.34 | M11         |
| 10.64 | -85.45 | M21         |
| 10.87 | -85.58 | M26         |
| 10.87 | -85.60 | M27         |
| 10.92 | -85.62 | M30         |
| 10.79 | -85.36 | M45         |
| 10.87 | -85.60 | M54         |

| Lat.  | Long.  | Mother | pop.    |
|-------|--------|--------|---------|
| 10.85 | -85.58 | M24    | lowland |
| 10.85 | -85.57 | M25    | lowland |
| 10.87 | -85.58 | M26    | lowland |
| 10.87 | -85.60 | M27    | lowland |
| 10.84 | -85.60 | M28    | lowland |
| 10.92 | -85.61 | M29    | lowland |
| 10.92 | -85.62 | M30    | lowland |
| 10.87 | -85.58 | M33    | lowland |
| 10.71 | -85.35 | M34    | lowland |
| 10.92 | -85.61 | M49    | lowland |
| 10.92 | -85.61 | M50    | lowland |
| 10.92 | -85.61 | M52    | lowland |
| 10.87 | -85.60 | M54    | lowland |
| 10.78 | -85.35 | M1     | upland  |
| 10.78 | -85.37 | M2     | upland  |
| 10.78 | -85.36 | M3     | upland  |
| 10.78 | -85.37 | M35    | upland  |
| 10.78 | -85.36 | M36    | upland  |
| 10.78 | -85.35 | M37    | upland  |
| 10.79 | -85.36 | M40    | upland  |
| 10.78 | -85.37 | M41    | upland  |
| 10.78 | -85.35 | M44    | upland  |
| 10.79 | -85.36 | M45    | upland  |
| 10.78 | -85.36 | M46    | upland  |
| 10.78 | -85.37 | M47    | upland  |
| 10.77 | -85.43 | M48    | upland  |
